# Supplementary material for: Exploring the superconductivity of CaSrB5: high-pressure stability and electron–phonon interactions
Source: Royal Society of Chemistry journal article supplement (doi:10.1039/d5ta01210d), 2025-01-01
Supplement: d5ta01210d1.pdf [file d5ta01210d1.pdf]

Supplement Information for  
**Exploring the superconductivity of CaSrB<sub>5</sub>: High-  
Pressure Stability and Electron-Phonon Interactions**

Bohan Cao<sup>1</sup>, Mengxin Yang<sup>1</sup>, Yibo Sun<sup>1</sup>, Xinwei Wang<sup>1</sup>, Fubo Tian<sup>\*1</sup>,  
Tian Cui<sup>\*2,1</sup>

<sup>1</sup>State Key Laboratory of Superhard Materials, College of Physics, Jilin  
University, Changchun 130012, China

<sup>2</sup>School of Physical Science and Technology, Ningbo University, Ningbo  
315211, China

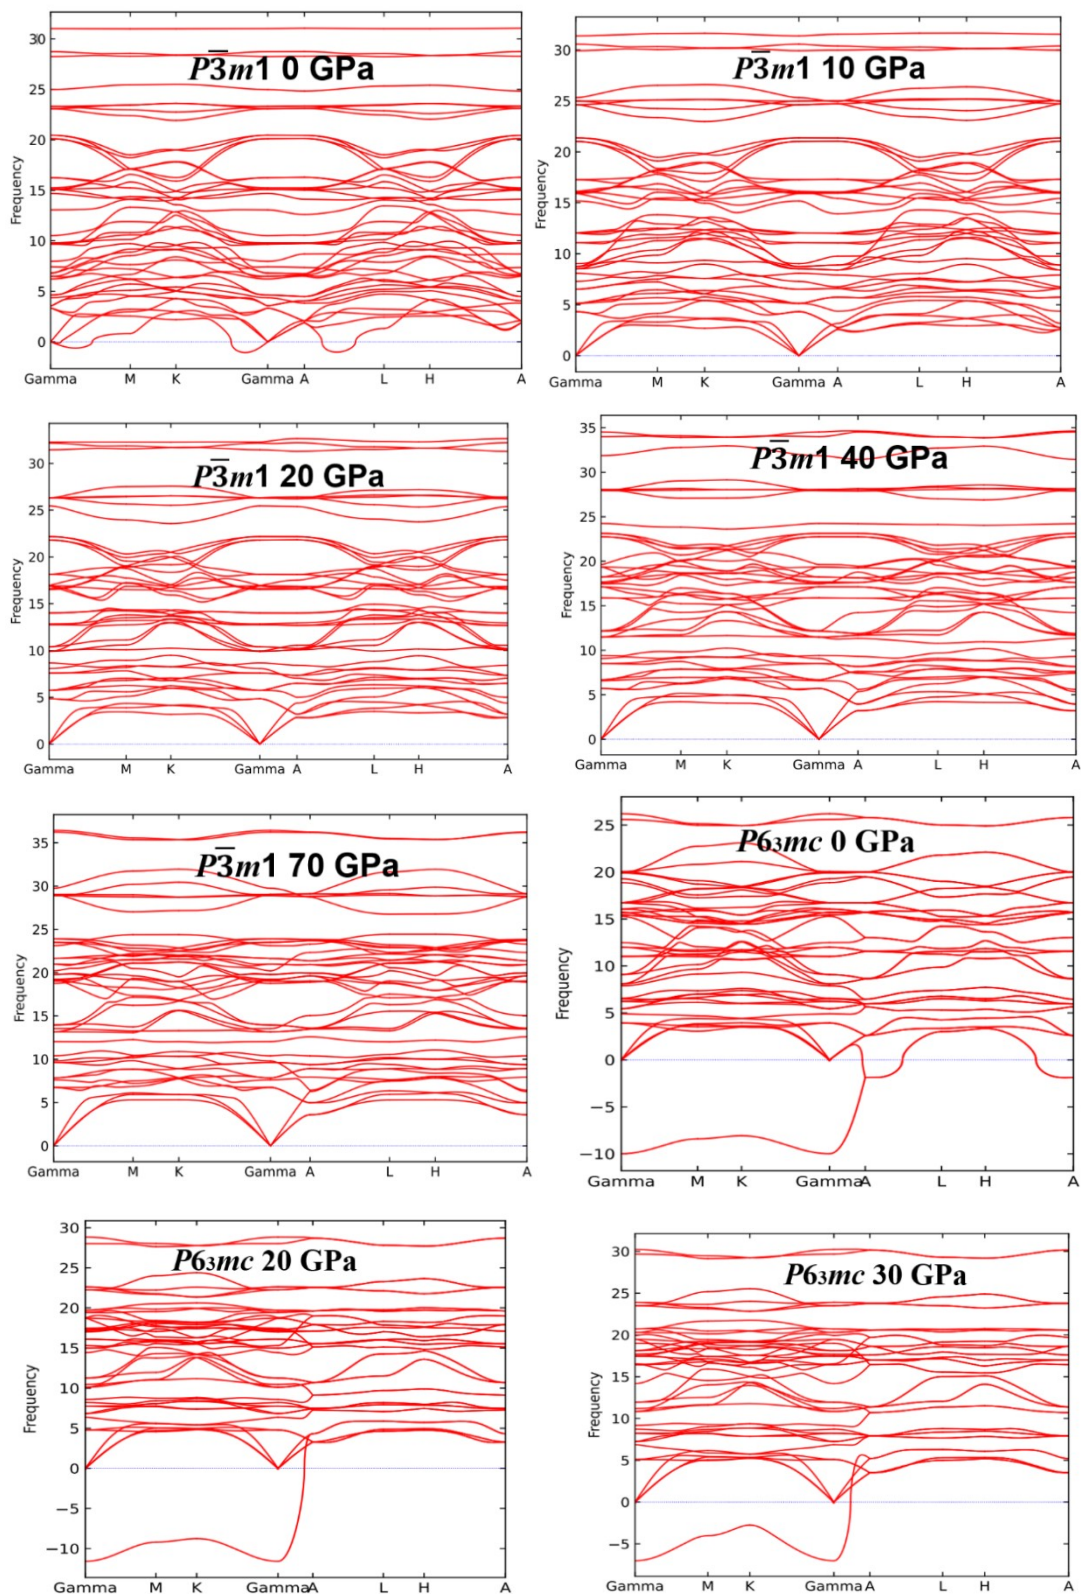

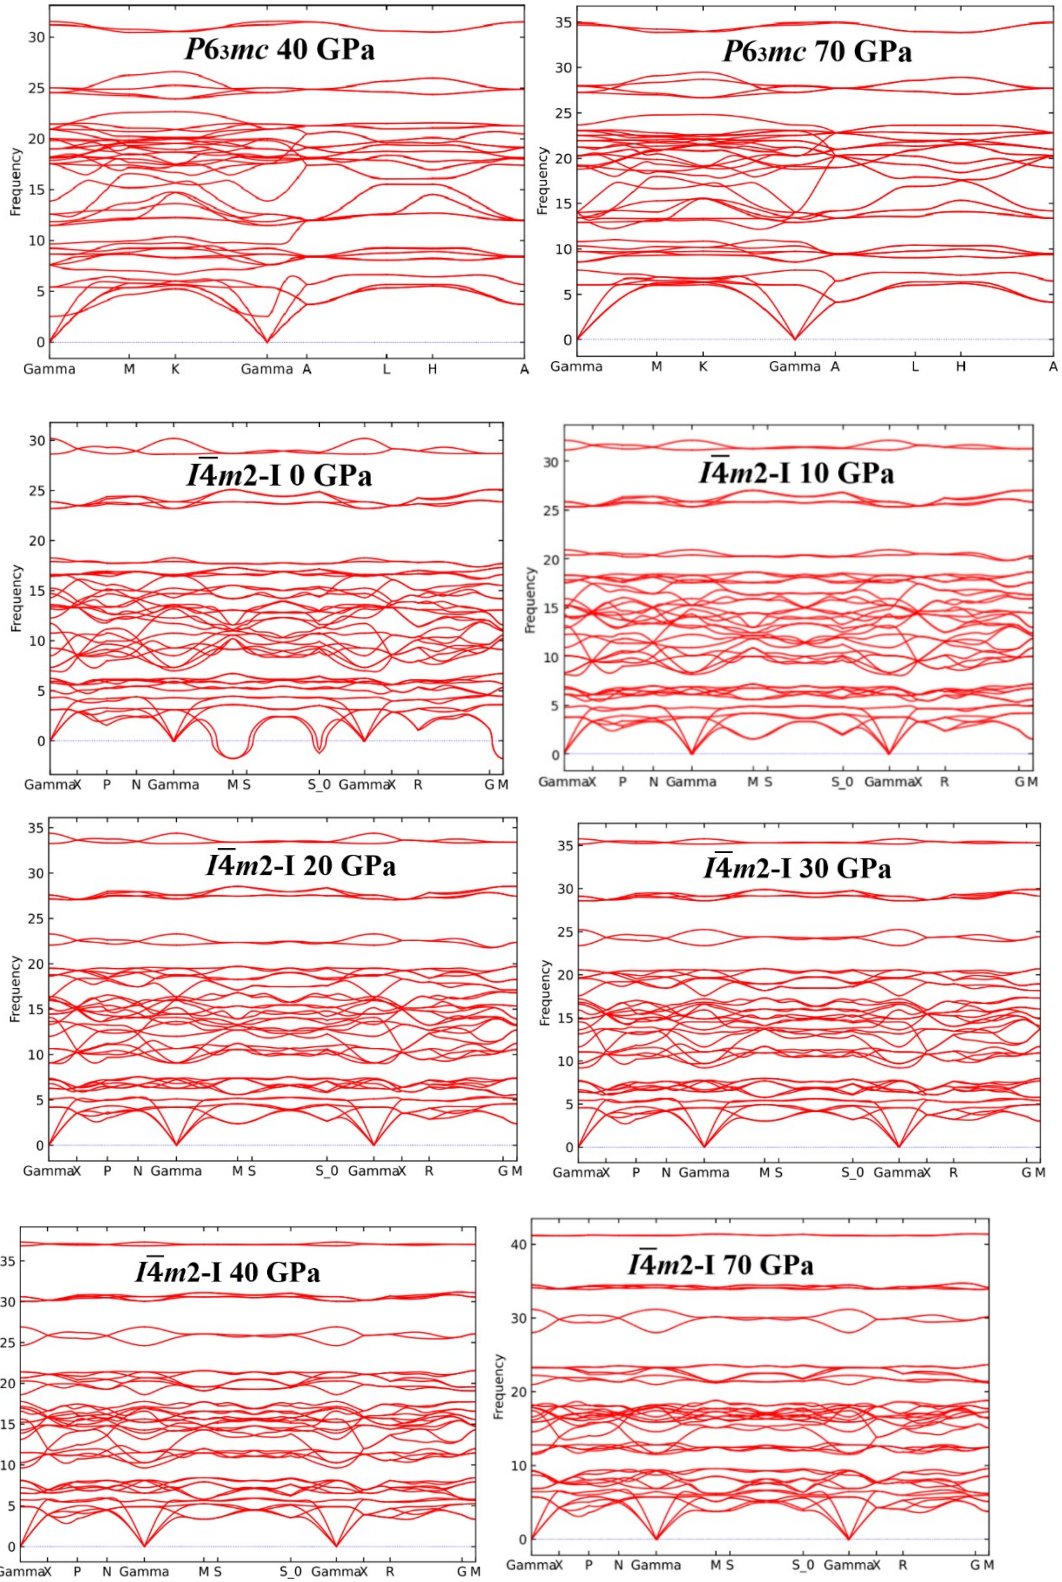



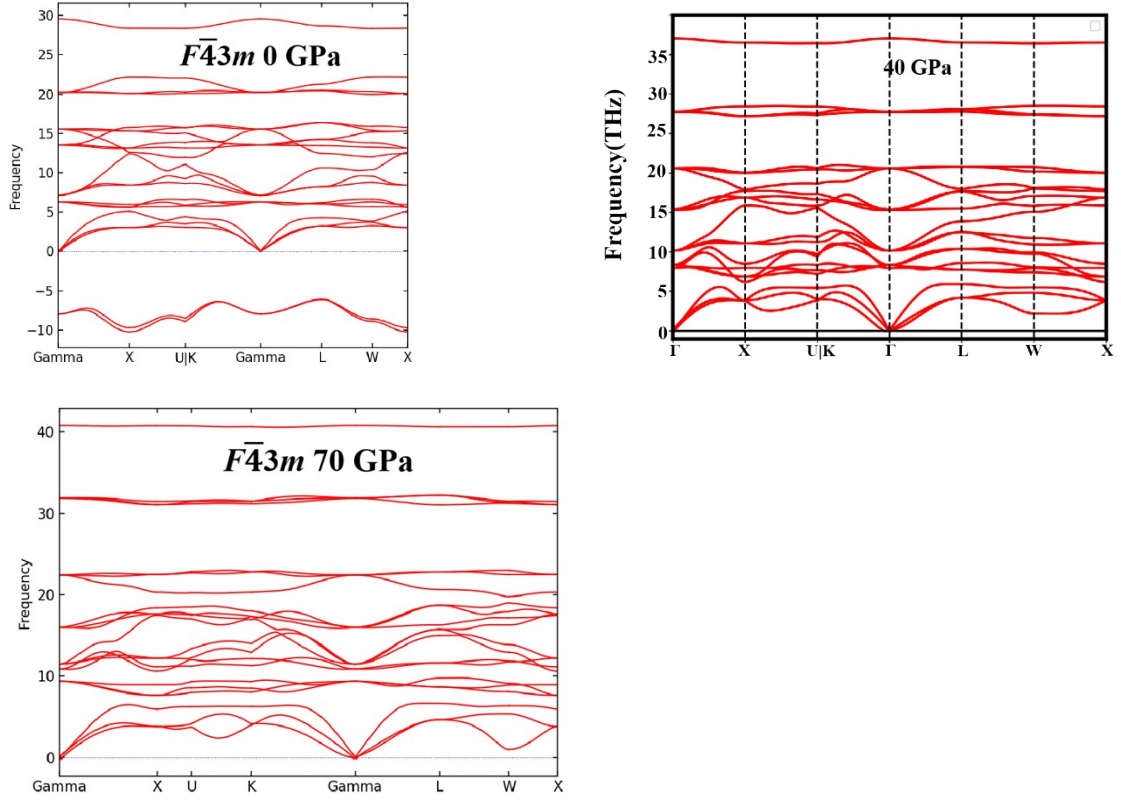

**FIG. S1** The phonon spectrum of  $F\bar{4}3m$ ,  $I\bar{4}m2$ -I,  $P6_3mc$  and  $P\bar{3}m1$  phase at various pressure by phonopy codes [1].

**Table S1.** The bond lengths of  $F\bar{4}3m$  phase,  $I\bar{4}m2$  phase by moving atoms and USPEX.

|                                 |                  |                   |                 |
|---------------------------------|------------------|-------------------|-----------------|
|                                 |                  |                   |                 |
| $F\bar{4}3m$ CaSrB <sub>5</sub> | $I\bar{4}m2$ -II | $I\bar{4}m2$ -III | $I\bar{4}m2$ -I |

|                                                    |       |       |       |       |
|----------------------------------------------------|-------|-------|-------|-------|
| d(Ca-Ca)                                           | 4.562 | 4.562 | 4.562 | 4.547 |
| d(Ca-Sr)                                           | 2.794 | 2.784 | 2.794 | 2.797 |
| d(Sr-Sr)                                           | 4.562 | 4.562 | 4.562 | 4.547 |
| d(B1-B2) =<br>d(B3-B4)                             | 1.706 | 1.695 | 1.730 | 1.795 |
| d(B1-B3) =<br>d(B2-B3) =<br>d(B1-B4) =<br>d(B2-B4) | 1.706 | 1.712 | 1.695 | 1.668 |
| d(B4-B5)                                           | 1.749 | 1.749 | 1.749 | 1.752 |
| d(Ca-B5)                                           | 2.794 | 2.794 | 2.794 | 3.260 |
| d(Sr-B5)                                           | 3.226 | 3.226 | 3.226 | 2.797 |

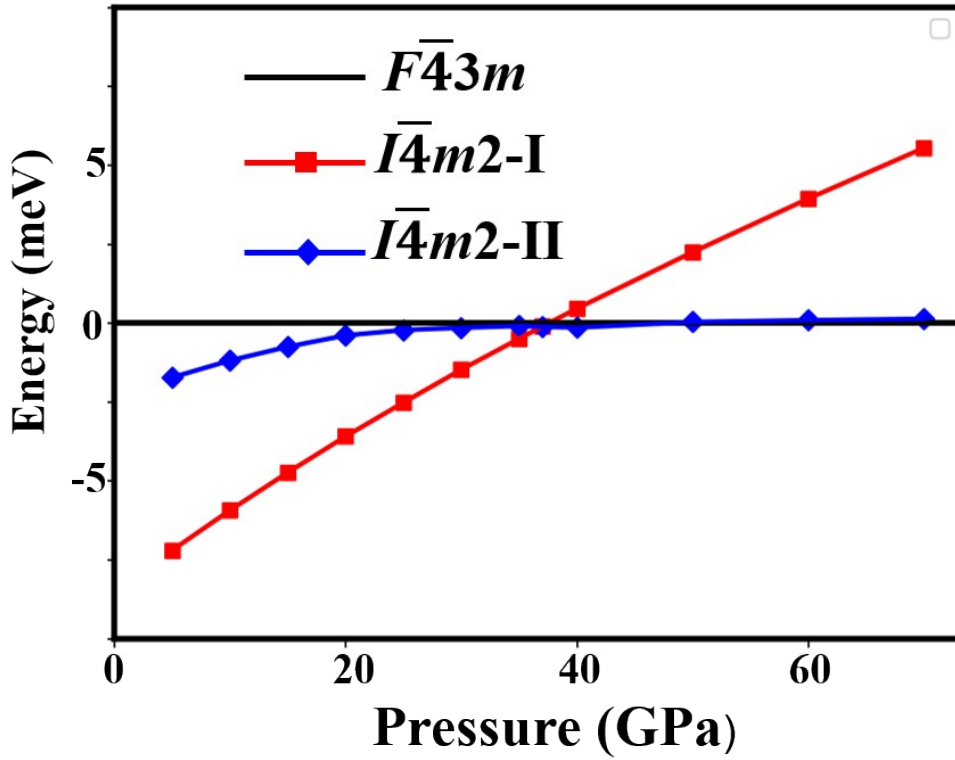

**FIG. S2** The enthalpy differences between the  $F\bar{4}3m$ ,  $I\bar{4}m2-I$  and  $I\bar{4}m2-II$  phases at range of 0 – 70 GPa.

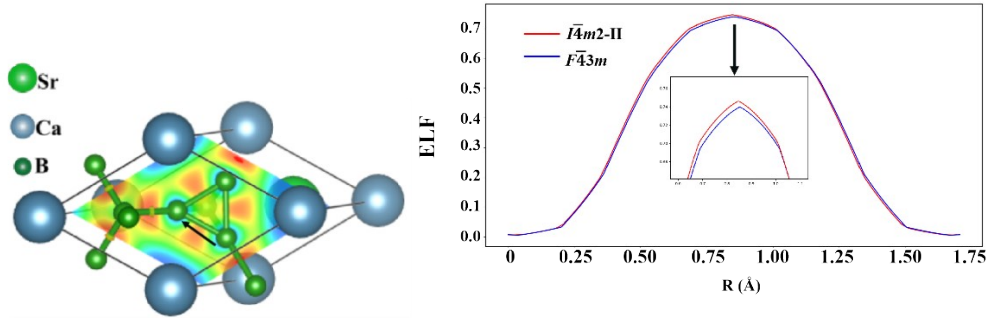

**FIG. S3** The ELF values across the B-B bond (along the black line) of  $F\bar{4}3m$  and  $I\bar{4}m2-II$  phases.

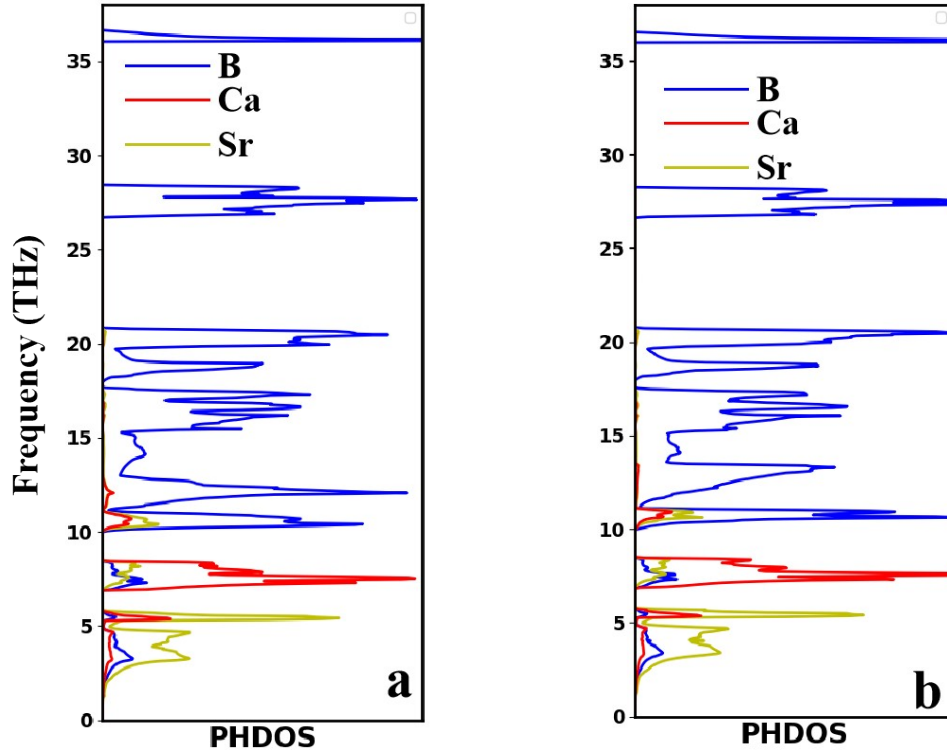

**FIG. S4** the phdos of  $\text{CaSrB}_5$  under both (a) harmonic and (b) anharmonic approximations

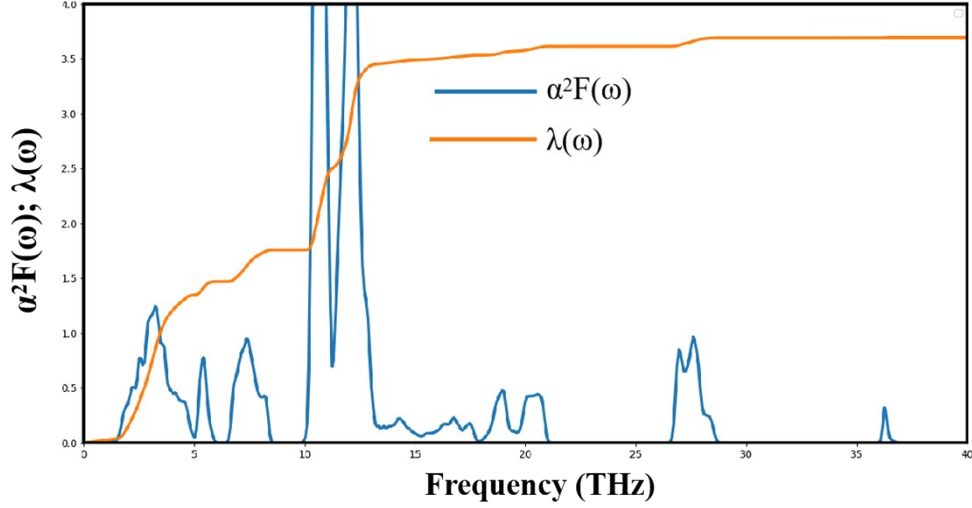

**FIG. S5.** Eliashberg spectral function  $\alpha^2F(\omega)$ , and accumulated  $\lambda(\omega)$  for  $F^4_3m$  phase by EPW codes[2]

**Table S2.** The Predicted structural parameters of CaSrB<sub>5</sub> compounds at 40 GPa

| structur<br>e | Lattice<br>parameters                                                                         | atoms  | (X, Y, Z)             |
|---------------|-----------------------------------------------------------------------------------------------|--------|-----------------------|
| $F^4_3m$      | $a=b=c=6.365\text{\AA}$<br>$\alpha=\beta=\gamma=90^\circ$                                     | Ca(4a) | (0.500, 0.000, 0.500) |
|               |                                                                                               | Sr(4c) | (0.750, 0.750, 0.250) |
|               |                                                                                               | B(16e) | (0.406, 0.906, 0.094) |
|               |                                                                                               | B(4d)  | (0.750, 0.750, 0.750) |
| $P^3_3m1$     | $a=b=4.370\text{\AA}$<br>$c=7.743\text{\AA}$<br>$\alpha=\beta=90^\circ$<br>$\gamma=120^\circ$ | Ca(2d) | (0.333, 0.667, 0.433) |
|               |                                                                                               | Sr(2d) | (0.333, 0.667, 0.065) |
|               |                                                                                               | B(2c)  | (0.000, 0.000, 0.831) |
|               |                                                                                               | B(2c)  | (0.000, 0.000, 0.391) |
|               |                                                                                               | B(6i)  | (0.204, 0.796, 0.736) |
| $I^4_2m2-I$   | $a=b=4.552\text{\AA}$<br>$c=6.242\text{\AA}$<br>$\alpha=\beta=\gamma=90^\circ$                | Ca(2c) | (0.000, 0.500, 0.250) |
|               |                                                                                               | Sr(2a) | (0.500, 0.500, 0.500) |
|               |                                                                                               | B(8i)  | (0.695, 0.500, 0.914) |
|               |                                                                                               | B(2d)  | (0.500, 0.000, 0.250) |
|               |                                                                                               | Ca(2b) | (0.667, 0.333, 0.097) |
| $P6_3mc$      | $a=b=4.369\text{\AA}$<br>$c=7.614\text{\AA}$<br>$\alpha=\beta=90^\circ$<br>$\gamma=120^\circ$ | Sr(2b) | (0.333, 0.667, 0.969) |
|               |                                                                                               | B(2a)  | (0.000, 0.000, 0.161) |
|               |                                                                                               | B(2a)  | (0.000, 0.000, 0.404) |
|               |                                                                                               | B(6c)  | (0.202, 0.798, 0.282) |

## REFERENCES

- [1] A. Togo, I. Tanaka, *Scr. Mater.* 2015, **108**, 1-5.
- [2] S. Poncé, E. R. Margine, C. Verdi, and F. Giustino, *Comp. Phys. Commun.* 2016, **209**, 116.
